# Supplementary material for: Retrospective evaluation of the Dutch pre‐newborn screening cohort for propionic acidemia and isolated methylmalonic acidemia: What to aim, expect, and evaluate from newborn screening?
Source: PubMed Central journal article supplement — J Inherit Metab Dis. 2019 Dec 22;43(3):424–37. doi: 10.1002/jimd.12193 (PMC7317354; doi:10.1002/jimd.12193), 2019-12-22
Supplement: JIMD-43-424-s001.pdf [file JIMD-43-424-s001.pdf]

## **Supplementary Notes S1 – Screening criteria**

### **1968, Wilson and Jungner, ten criteria to guide selection of conditions suitable for screening**

- (1) The condition sought should be an important health problem.
- (2) There should be an accepted treatment for patients with recognized disease.
- (3) Facilities for diagnosis and treatment should be available.
- (4) There should be a recognizable latent or early symptomatic stage.
- (5) There should be a suitable test or examination.
- (6) The test should be acceptable to the population.
- (7) The natural history of the condition, including development from latent to declared disease, should be adequately understood.
- (8) There should be an agreed policy on whom to treat as patients.
- (9) The cost of case-finding (including diagnosis and treatment of patients diagnosed) should be economically balanced in relation to possible expenditure on medical care as a whole.
- (10) Case-finding should be a continuing process and not a "once and for all" project.

### **2008, World Health Organisation, ten criteria additional to the Wilson and Jungner criteria**

- (1) The screening programme should respond to a recognized need.
- (2) The objectives of screening should be defined at the outset.
- (3) There should be a defined target population.
- (4) There should be scientific evidence of screening programme effectiveness.
- (5) The programme should integrate education, testing, clinical services and programme management.
- (6) There should be quality assurance, with mechanisms to minimize potential risks of screening.
- (7) The programme should ensure informed choice, confidentiality and respect for autonomy.
- (8) The programme should promote equity and access to screening for the entire target population.
- (9) Programme evaluation should be planned from the outset.
- (10) The overall benefits of screening should outweigh the harm.

## Supplementary Notes S2 – Definition of grouped outcome parameters

### Definition of “Adverse outcome (AO) of the first symptomatic phase” as clinical outcome parameter

|            |                                                                                                                                                                                         |
|------------|-----------------------------------------------------------------------------------------------------------------------------------------------------------------------------------------|
| No AO:     | No basal ganglia hyperintensities, or white matter abnormalities or movement disorder                                                                                                   |
| Mild AO:   | Basal ganglia hyperintensities or white matter abnormalities or movement disorder that can be most likely attributed to the first symptomatic phase, but not wheelchair-bound           |
| Severe AO: | Basal ganglia hyperintensities or white matter abnormalities or movement disorder, wheelchair-bound due to movement disorders that most likely arose due to the first symptomatic phase |
| Death:     | Death during or due to the first symptomatic phase                                                                                                                                      |

### Definition of “AMD frequency” as clinical outcome parameter

|                                                                        |                                                        |
|------------------------------------------------------------------------|--------------------------------------------------------|
| None:                                                                  | No episode of AMD during first four years of life      |
| Mild:                                                                  | $>0.0 \leq 0.5$ AMD/PY during first four years of life |
| Moderate:                                                              | $>0.5 \leq 1.0$ AMD/PY during first four years of life |
| Severe:                                                                | $>1.0 \leq 2.0$ AMD/PY during first four years of life |
| Very severe:                                                           | $>2.0$ AMD/PY during first four years of life          |
| Death:                                                                 | Death during or due to AMD, at any moment in life      |
| <i>Not assessed (NA): if death during or due to first presentation</i> |                                                        |

### Definition of “Cognitive function” as clinical outcome parameter

|                                                                                    |                               |
|------------------------------------------------------------------------------------|-------------------------------|
| Group 1:                                                                           | IQ $>90$ or regular education |
| Group 2:                                                                           | IQ 60-90 or special education |
| Group 3:                                                                           | IQ $<60$ or no education      |
| <i>Not assessed (NA): Last moment of follow-up <math>&lt;4</math> years of age</i> |                               |

### Definition of “Mitochondrial complications” as clinical outcome parameter

Twenty-one complications considered to be potentially caused by mitochondrial failure based on an extensive literature review [2] were included: hepatomegaly, epilepsy, cardiomyopathy, optic atrophy, pancreatitis, renal failure, sensorineural hearing loss, acute psychosis, stroke-like episodes, prolonged QTc interval, premature ovarian insufficiency, exercise intolerance, autism, feeding disorders, muscular hypotonia, constipation, attention deficit hyperactive disorder, anemia, leukopenia, thrombocytopenia and pancytopenia.

Severity is based on the number of complications recorded at the last moment of follow-up, as follows:

|              | 0-12 year                               | 13-18 year                 | 19-24 year                  | <u>&gt;25 years</u>         |
|--------------|-----------------------------------------|----------------------------|-----------------------------|-----------------------------|
| None:        | 0                                       | 0                          | 0                           | 0                           |
| Mild:        | 1-2                                     | 1-4                        | 1-6                         | 1-8                         |
| Moderate:    | 3-4                                     | 5-6                        | 7-8                         | 9-10                        |
| Severe:      | 5-6                                     | 7-8                        | 9-10                        | 11-12                       |
| Very severe: | <u><math>\geq 7</math></u>              | <u><math>\geq 9</math></u> | <u><math>\geq 11</math></u> | <u><math>\geq 13</math></u> |
| Death:       | Death due to mitochondrial complication |                            |                             |                             |

*Not assessed (NA): If death during or due to first presentation*

### Definition of “Treatment-related complications” as clinical outcome parameter

|                                                                        |                                                                |
|------------------------------------------------------------------------|----------------------------------------------------------------|
| None:                                                                  | No decreased BMD, no growth retardation, no obesity            |
| Mild:                                                                  | 1 of the following: decreased BMD, growth retardation, obesity |
| Severe:                                                                | 2 of the following: decreased BMD, growth retardation, obesity |
| Very severe:                                                           | Decreased BMD and growth retardation and obesity               |
| <i>Not assessed (NA): If death during or due to first presentation</i> |                                                                |

**Table S1 – Comparison of baseline characteristics and outcome parameters of patients identified through family screening and their index siblings**

|                                  | <b>P1.1</b> | <b>P1.2</b> | <b>P2.1</b> | <b>P2.2</b> | <b>P3.1</b> | <b>P3.2</b> | <b>P4.1</b> | <b>P4.2</b> | <b>P5.1</b> | <b>P5.2</b> | <b>P6.1</b> | <b>P6.2</b> | <b>P6.3</b> |
|----------------------------------|-------------|-------------|-------------|-------------|-------------|-------------|-------------|-------------|-------------|-------------|-------------|-------------|-------------|
| Gene                             | <i>PCCA</i> | <i>PCCA</i> | <i>PCCB</i> | <i>PCCB</i> | <i>PCCB</i> | <i>PCCB</i> | PA, uncl    |
| Sex                              | M           | F           | M           | M           | M           | M           | F           | M           | M           | F           | F           | M           | M           |
| Age at diagnosis                 | Day 15      | Day 0       | 0.7 y       | Day 2       | Day 3       | Day 0       | Day 18      | Day 1       | 5.0 y       | 2.0 y       | Day 8       | Day 4       | Day 1       |
| Age at death (years)             |             | 8.6         | 19.1        |             | 7.0         |             | 12.1        |             |             |             | 2.9         | 1.4         |             |
| Age last follow-up (years)       | 18.4        | 8.6         | 19.1        | 19.0        | 7.0         | 5.6         | 12.1        | 9.7         | 37.0        | 33.4        | 2.9         | 1.4         | 11.4        |
| Presentation type                | EO          | Family      | LO          | Family      | EO          | Family      | EO          | Family      | LO          | Family      | EO          | Family      | Family      |
| Adverse outc. first sympt. phase | Mild        | No          | Severe      | No          | Mild        | No          | Mild        | Mild        | No          | No          | Mild        | Mild        | Mild        |
| AMD frequency                    | Severe      | Severe      | Death       | Stable      | Death       | V. severe   | Death       | Severe      | Stable      | Stable      | Death       | Death       | V. severe   |
| Cognitive function               | Group 3     | Group 3     | Group 3     | Group 1     | NA          | Group 3     | Group 2     | Group 3     | Group 1     | Group 1     | NA          | NA          | Group 3     |
| Mitochondrial complications      | V. severe   | Death       | Moderate    | Mild        | V. severe   | Severe      | Severe      | V. severe   | None        | Mild        | V. severe   | V. severe   | V. severe   |
| Treatment-related complications  | V. severe   | Mild        | Mild        | Mild        | None        | Mild        | V. severe   | None        | None        | None        | None        | None        | Mild        |

**Table S1 – Continued**

|                                  | <b>P7.1</b> | <b>P7.2</b> | <b>P8.1</b> | <b>P8.2</b> | <b>P9.1</b> | <b>P9.2</b> |
|----------------------------------|-------------|-------------|-------------|-------------|-------------|-------------|
| Gene                             | <i>MUT</i>  | <i>MUT</i>  | <i>MUT</i>  | <i>MUT</i>  | <i>MMAB</i> | <i>MMAB</i> |
| Sex                              | M           | M           | M           | F           | F           | M           |
| Age at diagnosis                 | Day 3       | Day 0       | 0.2 y       | Day 0       | 3.9 y       | 1.6 y       |
| Age at death                     |             |             |             |             |             |             |
| Age last follow-up               | 13.9        | 1.7         | 18.5        | 13.7        | 18.3        | 16.1        |
| Presentation type                | EO          | Family      | LO          | Family      | LO          | Family      |
| Vitamin B12 responsiveness       | No          | No          | No          | No          | Yes         | Yes         |
| Adverse outc. first sympt. phase | Mild        | Mild        | Mild        | Mild        | Severe      | No          |
| AMD frequency                    | Severe      | NA          | Severe      | Severe      | Stable      | Stable      |
| Cognitive function               | Group 3     | NA          | Group 3     | Group 2     | Group 1     | Group 1     |
| Mitochondrial complications      | Severe      | Moderate    | Severe      | Moderate    | None        | Mild        |
| Treatment-related complications  | V. severe   | Mild        | V. severe   | Mild        | Mild        | None        |

Notes: Early onset: presentation  $\leq$ 28 days of life; Late onset: presentation  $>$ 28 days of life. Cognitive function group 1: IQ  $>$ 90 or regular education, group 2: IQ 60-90 or special education, group 3: IQ  $<$ 60 or no education. Abbreviations: AMD: acute metabolic decompensation; Adverse outc. first sympt. phase: Adverse outcome of the first symptomatic phase; EO: early onset; Family: family testing; F: female; LO: late onset; M: male; NA: Not assessed; V. severe: very severe; y: years.

**Table S2 – All mutations detected in PA and MMA related genes in the Dutch patient cohort**

| Gene | Mutation (c.)         | Mutation (p.)    | Mutation type     | Reported                 | Alleles | Origin        | Remarks                                                                                                                            |
|------|-----------------------|------------------|-------------------|--------------------------|---------|---------------|------------------------------------------------------------------------------------------------------------------------------------|
| PCCA | c.625G>C              | p.Ala209Pro      | Missense/Nonsense | No                       | 1       | Dutch         |                                                                                                                                    |
| PCCA | c.923dup              | p.Leu308Phefs*35 | Duplication       | No                       | 1       | Dutch         |                                                                                                                                    |
| PCCA | c.1409T>G             | p.Leu470Arg      | Missense/Nonsense | No                       | 6       | Moroccan      | 2 siblings HO, not reported consanguine;<br>1 individual HO, consanguine, not knowingly related to the 2 siblings                  |
| PCCA | c.2077A>C             | p.Met693Leu      | Missense/Nonsense | No                       | 1       | Dutch         |                                                                                                                                    |
| PCCA | Exon 2 deletion       |                  | Gross deletion    | No                       | 1       | Dutch         |                                                                                                                                    |
| PCCA | Exon 5 and 6 deletion |                  | Gross deletion    | No                       | 1       | Dutch         |                                                                                                                                    |
| PCCA | Exon 10 deletion      |                  | Gross deletion    | No                       | 1       | Dutch         |                                                                                                                                    |
| PCCA | c.1900-1G>A           |                  | Splicing          | Yang et al. 2004         | 2       | Afghan        | HO, consanguine                                                                                                                    |
| PCCA | c.2127delT            | p.Val710Cysfs*43 | Small deletion    | Campeau et al. 1999      | 1       | Dutch         |                                                                                                                                    |
| PCCB | c.644G>C              | p.Gly222Arg      | Missense/Nonsense | No                       | 2       | Turkish       | HO, consanguine                                                                                                                    |
| PCCB | c.671C>T              | p.Ala224Val      | Missense/Nonsense | No                       | 1       | Dutch         |                                                                                                                                    |
| PCCB | c.703A>C              | p.Thr235Pro      | Missense/Nonsense | No                       | 4       | Moroccan      | 2 siblings, HO, not reported consanguine                                                                                           |
| PCCB | c.883_885del          | p.Phe295del      | Small deletion    | No                       | 1       | Dutch         |                                                                                                                                    |
| PCCB | c.1127G>A             | p.Arg376His      | Missense/Nonsense | No                       | 4       | Turkish       | 2 siblings, HO, consanguine                                                                                                        |
| PCCB | c.337C>T              | p.Arg113*        | Missense/Nonsense | Brosch et al. 2008       | 2       | Turkish       | HO, consanguine                                                                                                                    |
| MUT  | c.623_624del          |                  | Small deletion    | No                       | 1       | Dutch         |                                                                                                                                    |
| MUT  | c.730A>C              | p.Gln213His      | Missense/Nonsense | No                       | 2       | Dutch         | HO, consanguinity unknown                                                                                                          |
| MUT  | c.1022dupA            | p.Asn341fs*      | Duplication       | No                       | 1       | Surinamese    |                                                                                                                                    |
| MUT  | c.1280G>T             | p.Gly427Val      | Missense/Nonsense | No                       | 2       | Egyptian      | HO, consanguine                                                                                                                    |
| MUT  | c.1311_1312insA       | p.Val438Serfs*3  | Small insertion   | No                       | 4       | Turkish/Dutch | 1 individual HO, consanguine;<br>1 individual HO, consanguinity unknown, not knowingly related                                     |
| MUT  | c.1690G>T             | p.Glu564*        | Missense/Nonsense | No                       | 2       | Turkish       | HO, consanguine                                                                                                                    |
| MUT  | c.1962_1963delTC      | p.Arg655*        | Missense/Nonsense | No                       | 4       | Turkish       | 2 siblings, HO, consanguine                                                                                                        |
| MUT  | c.2078delG            | p.Gly693Aspfs*12 | Small deletion    | No                       | 2       | Moroccan      | HO, consanguine                                                                                                                    |
| MUT  | c.322C>T              | p.Arg108Cys      | Missense/Nonsense | Worgan et al. 2006       | 4       | Dutch         | HE, 2 siblings, 2 individuals, not knowingly related                                                                               |
| MUT  | c.454C>T              | p.Arg152*        | Missense/Nonsense | Martinez et al. 2005     | 3       | Turkish/Dutch | 1 individual HO, consanguine; 1 individual HE, not knowingly related                                                               |
| MUT  | c.654A>C              | p.Gln218His      | Missense/Nonsense | Fuchshuber et al. 2000   | 6       | Dutch         | 2 individuals HO, 2 individuals HE, not reported consanguine, not knowingly related                                                |
| MUT  | c.655A>T              | p.Asn219Tyr      | Missense/Nonsense | Acquaviva et al. 2005    | 7       | Turkish/Dutch | 2 individuals HO (1 consanguine); 3 individuals (2 siblings) HE, not knowingly related                                             |
| MUT  | c.1106G>A             | p.Arg369His      | Missense/Nonsense | Janata et al. 1997       | 3       | Turkish/Dutch | 1 individual HO, consanguine; 1 individual HE, not knowingly related                                                               |
| MUT  | c.1160C>T             | p.Thr387Ile      | Missense/Nonsense | Dündar et al. 2012       | 2       | Syrian        | HO, consanguine                                                                                                                    |
| MUT  | c.1531C>T             | p.Arg511*        | Missense/Nonsense | Acquaviva et al. 2005    | 1       | Dutch         |                                                                                                                                    |
| MUT  | c.1677-1G>C           |                  | Splicing          | Acquaviva et al. 2005    | 1       | Dutch         |                                                                                                                                    |
| MUT  | c.2150G>T             | p.Gly717Val      | Missense/Nonsense | Crane et al. 1992        | 1       | Surinamese    |                                                                                                                                    |
| MMAA | c.202C>T              | p.Gln68*         | Missense/Nonsense | No                       | 1       | Dutch         |                                                                                                                                    |
| MMAA | c.455del              | p.Pro152Leufs*9  | Small deletion    | No                       | 6       | Turkish       | 2 siblings, 1 cousin, HO, consanguine                                                                                              |
| MMAA | c.433C>T              | p.Arg145*        | Missense/Nonsense | Yang et al. 2004         | 5       | Dutch         | 2 individuals HO (1 consanguine); 1 HE, not knowingly related                                                                      |
| MMAA | c.733+1G>A            |                  | Splicing          | Lerner-Ellis et al. 2004 | 4       | Dutch         | 1 individual HO (not reported consanguine); 2 individuals HE, not knowingly related                                                |
| MMAB | c.556C>T              | p.Arg186Trp      | Missense/Nonsense | Lerner-Ellis et al. 2006 | 5       | Dutch         | 1 individual HO (not reported consanguine);<br>3 individuals HE (2 siblings), patients not knowingly related (except the siblings) |
| MMAB | c.565_577del          | p.Cys189Argfs*   | Small deletion    | No                       | 1       | Hindi         |                                                                                                                                    |
| MMAB | c.655T>C              | p.Tyr219His      | Missense/Nonsense | No                       | 1       | Hindi         |                                                                                                                                    |
| MMAB | c.569G>A              | p.Arg190His      | Missense/Nonsense | Lerner-Ellis et al. 2006 | 1       | Dutch         |                                                                                                                                    |
| MMAB | c.197-1G>A            |                  | Splicing          | Lerner-Ellis et al. 2006 | 2       | Dutch         | HE, 2 siblings                                                                                                                     |
| MMAB | c.700C>T              | p.Gln234*        | Missense/Nonsense | Lerner-Ellis et al. 2006 | 2       | Dutch         | HE, 2 individuals, not knowingly related                                                                                           |

Mutation (c.) depicts the genetic change in the DNA coding sequence, mutation (p.) depicts the resulting change in the protein coding sequence. HO: homozygous, HE: heterozygous. In one patient with a mutation in *PCCA*, no other mutation at the other allele was identified. References:

- Acquaviva C, Benoist JF, Pereira S, Callebaut I, Koskas T, Porquet D, Elion J (2005) Molecular basis of methylmalonyl-CoA mutase apoenzyme defect in 40 European patients affected by mut(0) and mut- forms of methylmalonic acidemia: identification of 29 novel mutations in the MUT gene. *Hum. Mutat.* 25(2):167-76.
- Brosch S, Rauffeisen A, Baur M, Michels L, Trefz FK, Pfister M (2008) Propionic acidemia and sensorineural hearing loss: is there a connection at the molecular genetics level? *HNO* 56(1):37-42.
- Campeau E, Dupuis L, León-Del-Río A, Gravel R (1999) Coding sequence mutations in the alpha subunit of propionyl-CoA carboxylase in patients with propionic acidemia. *Mol Genet Metab* 67(1):11-22.
- Crane AM, Martin LS, Valle D, Ledley FD (1992) Phenotype of disease in three patients with identical mutations in methylmalonyl-CoA mutase. *Hum. Genet.* 89(3):259-64.
- Dündar H, Özgül RK, Güzel-Ozantürk A et al (2012) Microarray based mutational analysis of patients with methylmalonic acidemia: identification of 10 novel mutations. *Mol Genet Metab* 106(4):419-23.
- Fuchshuber A, Mucha B, Baumgartner ER, Vollmer M, Hildebrandt F (2000) Mut0 methylmalonic acidemia: eleven novel mutations of the methylmalonyl-CoA mutase including a deletion-insertion mutation. *Hum. Mutat.* 16(2):179.
- Janata J, Kogekar N, Fenton WA (1997) Expression and kinetic characterization of methylmalonyl-CoA mutase from patients with the mut- phenotype: evidence for naturally occurring interallelic complementation. *Hum Mol Genet* 6(9):1457-64.
- Lerner-Ellis JP, Dobson CM, Wai T et al (2004) Mutations in the MMAA gene in patients with cblA disorder of vitamin B12 metabolism. *Hum. Mutat.* 24(6):509-16.
- Lerner-Ellis JP, Gradinger AB, Watkins D et al (2006) Mutation and biochemical analysis of patients belonging to the cblB complementation class of vitamin B12-dependent methylmalonic aciduria. *Mol Genet Metab* 87(3):219-25.
- Martínez MA, Rincón A, Desviat LR, Merinero B, Ugarte M, Pérez B (2005) Genetic analysis of three genes causing isolated methylmalonic acidemia: identification of 21 novel allelic variants. *Mol Genet Metab* 84(4):317-25.
- Yang X, Sakamoto O, Matsubara Y et al (2004) Mutation spectrum of the PCCA and PCCB genes in Japanese patients with propionic acidemia. *Mol Genet Metab* 81(4):335-42.
- Worgan LC, Niles K, Tirone JC et al (2006) Spectrum of mutations in mut methylmalonic acidemia and identification of a common Hispanic mutation and haplotype. *Hum Mutat* 27(1):31-43.

**Table S3 – Pregnancy, delivery and birth weight parameters**

|                                           | <b>Propionic acidemia<br/>(n = 31)</b> | <b>Methylmalonic acidemia<br/>(n = 45)</b> | <b>P-value</b> | <b>Bonferroni<br/>correction</b> |
|-------------------------------------------|----------------------------------------|--------------------------------------------|----------------|----------------------------------|
| Maternal health problems during pregnancy | n = 2; 6%                              | n = 3; 7%                                  | 1.000          | NS                               |
| Delivery via caesarean section            | n = 4; 13%                             | n = 2; 4%                                  | 0.218          | NS                               |
| Gemelli                                   | n = 1; 3%                              | n = 1; 2%                                  | 1.000          | NS                               |
| Gestational age                           |                                        |                                            |                |                                  |
| Prematurity (<36 weeks)                   | n = 0; 0%                              | n = 5; 11%                                 | 0.075          | NS                               |
| Serotinity (>42 weeks)                    | n = 0; 0%                              | n = 5; 11%                                 | 0.075          | NS                               |
| Abnormal APGAR scores                     | n = 2; 6%                              | n = 4; 9%                                  | 1.000          | NS                               |
| Birth weight (median ± SD; (n))           | 0.38 ± 1.61 SDS (23)                   | -1.48 ± 1.19 SDS (32)                      | <0.001         | <b>&lt;0.001</b>                 |
| Birth weight < -2 SDS                     | n = 2; 9% (23)                         | n = 10; 31% (32)                           | 0.055          | NS                               |

Notes: Student's *t* tests were performed for quantitative data and Fisher's exact tests were performed for qualitative data. All p-values were adjusted according to the Bonferroni method. Adjusted p-values < .05 were considered statistically significant and are depicted in bold. Abbreviations: NS: not significant; SDS: standard deviation score.

**Table S4 – Symptoms and signs, laboratory tests and interventions during the first symptomatic phase**

|                                           | <b>Early onset<br/>(n = 29)</b>  | <b>Late onset<br/>(n = 34)</b>   | <b>P-value</b> | <b>Bonferroni<br/>correction</b> |
|-------------------------------------------|----------------------------------|----------------------------------|----------------|----------------------------------|
| <b>Symptoms and signs</b>                 |                                  |                                  |                |                                  |
| Lethargy                                  | n = 21; 72%                      | n = 19; 56%                      | 0.199          | NS                               |
| Anorexia                                  | n = 20; 69%                      | n = 18; 53%                      | 0.211          | NS                               |
| Vomiting                                  | n = 6; 21%                       | n = 26; 76%                      | <0.001         | <b>&lt;0.001</b>                 |
| Hypotonia                                 | n = 14; 48%                      | n = 12; 35%                      | 0.318          | NS                               |
| Dehydration                               | n = 11; 38%                      | n = 8; 24%                       | 0.275          | NS                               |
| Kussmaul breathing                        | n = 9; 31%                       | n = 10; 29%                      | 1.000          | NS                               |
| Tachypnea                                 | n = 9; 31%                       | n = 2; 6%                        | 0.017          | NS                               |
| Weight loss                               | n = 5; 17%                       | n = 5; 15%                       | 1.000          | NS                               |
| Hypothermia                               | n = 7; 24%                       | n = 1; 3%                        | 0.019          | NS                               |
| Coma                                      | n = 1; 3%                        | n = 5; 15%                       | 0.205          | NS                               |
| Failure to thrive                         | n = 0; 0%                        | n = 6; 18%                       | 0.027          | NS                               |
| Global developmental delay                | n = 0; 0%                        | n = 3; 9%                        | 0.243          | NS                               |
| <b>Laboratory tests</b>                   |                                  |                                  |                |                                  |
|                                           | <b>Median ± SD [Min-Max] (N)</b> | <b>Median ± SD [Min-Max] (N)</b> |                |                                  |
| Glucose mmol/L                            | 5.5 ± 6.2 [1.6 – 25.4] (22)      | 7.2 ± 7.6 [1.2 – 34.0] (23)      | 0.465          | NS                               |
| pH                                        | 7.33 ± 0.14 [6.89 – 7.43] (26)   | 7.28 ± 0.17 [6.81 – 7.42] (27)   | 0.179          | NS                               |
| pCO <sub>2</sub> mmHg                     | 28.1 ± 14.0 [12.0 – 62.3] (23)   | 18.7 ± 12.5 [10.0 – 60.0] (22)   | 0.023          | NS                               |
| Bicarbonate mmol/L                        | 16.1 ± 6.3 [3.2 – 24.9] (25)     | 7.5 ± 6.7 [2.8 – 23.0] (22)      | 0.006          | NS                               |
| Base excess mmol/L                        | -9.0 ± 8.5 [-30.0 – 0.1] (23)    | -19.1 ± 8.9 [-28.2 – -1.0] (25)  | 0.052          | NS                               |
| Lactate mmol/L                            | 2.2 ± 1.2 [1.0 – 6.0] (19)       | 2.2 ± 2.0 [0.7 – 6.8] (19)       | 0.353          | NS                               |
| Ammonia μmol/L                            | 934 ± 629 [170 – 2767] (20)      | 137 ± 104 [49 – 400] (19)        | <0.001         | <b>&lt;0.001</b>                 |
| Haemoglobin mmol/L                        | 9.1 ± 1.7 [5.8 – 13.7] (22)      | 6.9 ± 1.0 [5.2 – 9.0] (25)       | <0.001         | <b>&lt;0.001</b>                 |
| Thrombocytes *10 <sup>9</sup> /L          | 292 ± 103 [6 – 358] (22)         | 321 ± 158 [98 – 892] (22)        | 0.027          | NS                               |
| Leukocytes *10 <sup>9</sup> /L            | 6.2 ± 4.8 [1.8 – 21.0] (23)      | 8.0 ± 7.4 [0.8 – 33.6] (25)      | 0.108          | NS                               |
| <b>Interventions</b>                      |                                  |                                  |                |                                  |
| Intensive care unit admission             | n = 18; 62%                      | n = 15; 44%                      | 0.208          | NS                               |
| Mechanical ventilation                    | n = 13; 45%                      | n = 10; 29%                      | 0.294          | NS                               |
| Dialysis (any type) due to hyperammonemia | n = 11; 38%                      | n = 0; 0%                        | <0.001         | <b>&lt;0.001</b>                 |

Notes: Early onset: presentation ≤28 days of life; Late onset: presentation >28 days of life. Student's *t* tests were performed for quantitative data and Fisher's exact tests were performed for qualitative data. All p-values were adjusted according to the Bonferroni method. Adjusted p-values < .05 were considered statistically significant and are depicted in bold. Abbreviations: Min.: minimum value; Max.: maximum value; NS: not significant.

**Table S5 – Adverse outcome due to the first symptomatic phase**

|                 | Propionic acidemia<br>(n = 31) |                              |                | Methylmalonic acidemia<br>(n = 45)                  |                                                   | P-value        | Bonferroni<br>correction |
|-----------------|--------------------------------|------------------------------|----------------|-----------------------------------------------------|---------------------------------------------------|----------------|--------------------------|
| No AO           | n = 14; 45%                    |                              |                | n = 26; 58%                                         |                                                   | 0.352          | NS                       |
| Mild AO         | n = 15; 48%                    |                              |                | n = 15; 33%                                         |                                                   | 0.235          | NS                       |
| Severe AO       | n = 1; 3%                      |                              |                | n = 3; 7%                                           |                                                   | 0.641          | NS                       |
| Death due to AO | n = 1; 3%                      |                              |                | n = 1; 2%                                           |                                                   | 1.000          | NS                       |
|                 | <b>Early onset</b><br>(n = 15) | <b>Late onset</b><br>(n = 8) | <b>P-value</b> | <b>Early onset</b><br>(n = 14)                      | <b>Late onset</b><br>(n = 26)                     | <b>P-value</b> |                          |
| No AO           | n = 4; 27%                     | n = 6; 75%                   | <b>0.039</b>   | n = 7; 50%                                          | n = 17; 65%                                       | 0.500          | NS; NS                   |
| Mild AO         | n = 10; 67%                    | n = 1; 13%                   | <b>0.027</b>   | n = 7; 50%                                          | n = 5; 19%                                        | 0.071          | NS; NS                   |
| Severe AO       | n = 0; 0%                      | n = 1; 13%                   | 0.348          | n = 0; 0%                                           | n = 3; 12%                                        | 0.539          | NS; NS                   |
| Death due to AO | n = 1; 7%                      | n = 0; 0%                    | 1.000          | n = 0; 0%                                           | n = 1; 4%                                         | 1.000          | NS; NS                   |
|                 |                                |                              |                | <b>Vitamin B12<br/>unresponsiveness</b><br>(n = 24) | <b>Vitamin B12<br/>responsiveness</b><br>(n = 21) | <b>P-value</b> |                          |
| No AO           |                                |                              |                | n = 12; 50%                                         | n = 14; 67%                                       | 0.366          | NS                       |
| Mild AO         |                                |                              |                | n = 11; 46%                                         | n = 4; 19%                                        | 0.068          | NS                       |
| Severe AO       |                                |                              |                | n = 1; 4%                                           | n = 2; 10%                                        | 0.592          | NS                       |
| Death due to AO |                                |                              |                | n = 0; 0%                                           | n = 1; 5%                                         | 0.467          | NS                       |

Notes: Early onset: presentation  $\leq$ 28 days of life; Late onset: presentation >28 days of life. Statistical significance was determined by performing Fisher's exact tests. All p-values were adjusted according to the Bonferroni method. Adjusted p-values < .05 were considered statistically significant. Abbreviations: AO: adverse outcome; NS: not significant.

**Table S6 – Acute metabolic decompensations**

|                           | <b>Propionic acidemia<br/>(n = 31)</b><br><i>n = ; median ± SD /PY [range]</i> | <b>Methylmalonic acidemia<br/>(n = 45)</b><br><i>n = ; median ± SD /PY [range]</i> | <b>P-value</b> | <b>Bonferroni<br/>correction</b> |
|---------------------------|--------------------------------------------------------------------------------|------------------------------------------------------------------------------------|----------------|----------------------------------|
| Total                     | 394; 0.7 ± 1.6 [0.0 – 7.3]                                                     | 568; 0.4 ± 1.1 [0.0 – 4.7]                                                         | 0.257          | NS                               |
| Early onset               | 293; 1.2 ± 1.3 [0.0 – 4.2]                                                     | 254; 0.9 ± 1.4 [0.0 – 4.7]                                                         | 0.604          | NS                               |
| Late onset                | 22; 0.2 ± 0.2 [0.0 – 0.7]                                                      | 242; 0.2 ± 0.9 [0.0 – 3.5]                                                         | 0.032          | NS                               |
| Family testing            | 79; 0.8 ± 2.7 [0.0 – 7.3]                                                      | 72; 0.6 ± 1.1 [0.0 – 2.8]                                                          | 0.327          | NS                               |
| Vitamin B12 unresponsive  |                                                                                | 504; 1.0 ± 1.1 [0.0 – 4.7]                                                         |                |                                  |
| Vitamin B12 responsive    |                                                                                | 64; 0.1 ± 0.8 [0.0 – 3.5]                                                          | 0.001          | <b>0.001</b>                     |
| <b>Age</b>                |                                                                                |                                                                                    |                |                                  |
| <1 years                  | 55; 1.0 ± 2.0 [0.0 – 7.0]                                                      | 38; 0.0 ± 1.4 [0.0 – 5.0]                                                          | 0.032          | NS                               |
| 1-3 years                 | 136; 1.0 ± 2.0 [0.0 – 8.3]                                                     | 156; 0.3 ± 1.7 [0.0 – 6.7]                                                         | 0.485          | NS                               |
| 4-11 years                | 146; 0.3 ± 0.9 [0.0 – 3.5]                                                     | 206; 0.1 ± 1.0 [0.0 – 5.0]                                                         | 0.940          | NS                               |
| 12-17 years               | 40; 0.0 ± 0.5 [0.0 – 2.0]                                                      | 85; 0.0 ± 0.8 [0.0 – 4.0]                                                          | 0.483          | NS                               |
| ≥18 years                 | 17; 0.0 ± 0.4 [0.0 – 1.8]                                                      | 73; 0.0 ± 1.2 [0.0 – 9.9]                                                          | 0.145          | NS                               |
| <b>Admission duration</b> |                                                                                |                                                                                    |                |                                  |
| 1 – 3 days                | 110; 28%                                                                       | 207; 36%                                                                           | 0.006          | <b>0.026</b>                     |
| 4 – 7 days                | 143; 36%                                                                       | 164; 29%                                                                           | 0.017          | NS                               |
| 8 – 14 days               | 80; 20%                                                                        | 96; 17%                                                                            | 0.203          | NS                               |
| ≥ 15 days                 | 51; 13%                                                                        | 45; 8%                                                                             | 0.012          | <b>0.047</b>                     |
| NA                        | 10; 3%                                                                         | 56; 10%                                                                            |                |                                  |
| <b>ICU admission</b>      | 23; 5.8%                                                                       | 18; 3.1%                                                                           | 0.051          | NS                               |
| <b>Triggers</b>           |                                                                                |                                                                                    |                |                                  |
| Upper RTI                 | 114; 29%                                                                       | 154; 27%                                                                           | 0.559          | NS                               |
| Unknown                   | 77; 20%                                                                        | 141; 25%                                                                           | 0.060          | NS                               |
| Gastro-enteritis          | 75; 19%                                                                        | 111; 20%                                                                           | 0.868          | NS                               |
| Feeding problems          | 16; 4%                                                                         | 50; 9%                                                                             | 0.004          | <b>0.033</b>                     |
| Bacterial infection       | 24; 6%                                                                         | 32; 6%                                                                             | 0.781          | NS                               |
| Constipation              | 39; 10%                                                                        | 4; 1%                                                                              | <0.001         | <b>&lt;0.001</b>                 |
| Chronic instability       | 13; 3%                                                                         | 9; 2%                                                                              | 0.123          | NS                               |
| Protein overload          | 4; 1%                                                                          | 4; 1%                                                                              | 0.723          | NS                               |
| Other                     | 16; 4%                                                                         | 11; 2%                                                                             | 0.072          | NS                               |
| NA                        | 16; 4%                                                                         | 52; 9%                                                                             |                |                                  |
| <b>AMD frequency</b>      |                                                                                |                                                                                    |                |                                  |
| None                      | 7; 23%                                                                         | 14; 31%                                                                            | 0.448          | NS                               |
| Mild                      | 2; 6%                                                                          | 2; 4%                                                                              | 1.000          | NS                               |
| Moderate                  | 1; 3%                                                                          | 3; 7%                                                                              | 0.641          | NS                               |
| Severe                    | 6; 19%                                                                         | 6; 13%                                                                             | 0.532          | NS                               |
| Very severe               | 8; 26%                                                                         | 10; 22%                                                                            | 0.787          | NS                               |
| Death                     | 5; 16%                                                                         | 1; 2%                                                                              | 0.038          | NS                               |
| NA                        | 2; 6%                                                                          | 9; 20%                                                                             |                |                                  |

Notes: Early onset: presentation ≤28 days of life; Late onset: presentation >28 days of life. Student's *t* tests were performed for quantitative data and Fisher's exact tests were performed for qualitative data. All p-values were adjusted according to the Bonferroni method. Adjusted p-values < .05 were considered statistically significant and are depicted in bold. Abbreviations: AMD: Acute metabolic decompensation; ICU: intensive care unit; NA: not assessed; NS: not significant; PY: patient year; RTI: respiratory tract infection.



**Table S7 – Complications with potential mitochondrial etiology**

| Mitochondrial Pathophysiology <sup>a</sup>              |          | Propionic acidemia (n = 31)        |      | Methylmalonic acidemia (n = 45)   |      | P-value | Bonferroni correction |
|---------------------------------------------------------|----------|------------------------------------|------|-----------------------------------|------|---------|-----------------------|
|                                                         |          | This cohort                        | Lit. | This cohort                       | Lit. |         |                       |
| <b>Mitochondrial complications during first pres.</b>   |          |                                    |      |                                   |      |         |                       |
| Basal ganglia hyperintensities                          | Probably | n = 10; 32%                        | 22%  | n = 8; 18%                        | 28%  | 0.175   | NS                    |
| White matter lesions                                    |          | n = 6; 19%                         | 39%  | n = 8; 18%                        | 32%  | 1.000   | NS                    |
| <b>Complications related to first presentation</b>      |          |                                    |      |                                   |      |         |                       |
| Cerebral atrophy                                        |          | n = 13; 42%                        |      | n = 11; 24%                       |      | 0.135   | NS                    |
| Movement disorders                                      |          | n = 10; 32%                        | 16%  | n = 14; 31%                       | 32%  | 1.000   | NS                    |
| Psychomotor retardation                                 |          | n = 19; 61%                        | 49%  | n = 24; 53%                       | 53%  | 0.638   | NS                    |
| Cognitive dysfunction                                   |          | n = 20; 65%                        | 69%  | n = 19; 42%                       | 58%  | 0.066   | NS                    |
| Group 1: IQ >90 or regular education                    |          | n = 7; 23%                         |      | n = 17; 38%                       |      | 0.212   | NS                    |
| Group 2: IQ 60-90 or special education                  |          | n = 7; 23%                         |      | n = 13; 29%                       |      | 0.604   | NS                    |
| Group 3: IQ <60 or no education                         |          | n = 13; 42%                        |      | n = 6; 13%                        |      | 0.007   | <b>0.021</b>          |
| NA                                                      |          | n = 4; 13%                         |      | n = 9; 20%                        |      |         |                       |
| <b>Mitochondrial complications with acute onset</b>     |          |                                    |      |                                   |      |         |                       |
| Hepatomegaly and/or hyperechogenic liver                | Probably | n = 11; 35%<br>3.3 y (0.1 – 57.1)  | 78%  | n = 14; 31%<br>0.4 y (0.0 – 9.9)  | 33%  | 0.805   | NS                    |
| Epilepsy                                                | Probably | n = 7; 23%<br>0.0 y (0.0 – 6.3)    | 23%  | n = 2; 4%<br>2.1 y (0.0 – 4.2)    | 13%  | 0.027   | NS                    |
| Cardiomyopathy                                          | Probably | n = 7; 23%<br>8.5 y (7.5 – 56.3)   | 14%  | n = 1; 2%<br>23.3 y               | 5%   | 0.007   | NS                    |
| Optic atrophy                                           | Probably | n = 4; 13%<br>15.9 y (11.8 – 16.7) | 5%   | n = 4; 9%<br>20.8 y (12.6 – 26.9) | 6%   | 0.709   | NS                    |
| Pancreatitis                                            | Probably | n = 1; 3%<br>20.8 y                | 5%   | n = 2; 4%<br>19.1 y (9.5 – 28.7)  | 4%   | 1.000   | NS                    |
| Renal failure                                           | Possibly | n = 1; 3%<br>21.4 y                | 1%   | n = 20; 44%<br>8.9 y (1.2 – 31.3) | 29%  | <0.001  | <b>&lt;0.001</b>      |
| Sensorineural hearing loss                              | Possibly | n = 6; 19%<br>6.6 y (2.0 – 8.5)    | 4%   | n = 3; 7%<br>4.8 y (2.5 – 9.8)    | 2%   | 0.434   | NS                    |
| Acute psychosis                                         | Possibly | n = 3; 10%<br>17.2 y (16.8 – 23.5) |      | n = 0; 0%                         |      | 0.064   | NS                    |
| Stroke-like episodes                                    | Possibly | n = 2; 7%<br>13.4 y (9.0 – 17.9)   | 14%  | n = 0; 0%                         | 17%  | 0.163   | NS                    |
| Prolonged QTc interval                                  | Unknown  | n = 7; 23%<br>8.5 y (0.0 – 38.3)   | 31%  | n = 4; 9%<br>14.0 y (3.6 – 28.4)  | 2%   | 0.300   | NS                    |
| Premature ovarian insufficiency                         | Unknown  | n = 0; 0%                          |      | n = 1; 2%<br>19.1 y               |      | 1.000   | NS                    |
| <b>Mitochondrial complications with chronic onset</b>   |          |                                    |      |                                   |      |         |                       |
| Exercise intolerance                                    | Probably | n = 15; 48%                        |      | n = 10; 22%                       |      | 0.025   | NS                    |
| Autism                                                  | Probably | n = 2; 6%                          | 9%   | n = 4; 9%                         |      | 1.000   | NS                    |
| Feeding problems                                        | Possibly | n = 18; 58%                        |      | n = 22; 49%                       |      | 0.488   | NS                    |
| Muscular hypotonia                                      | Possibly | n = 13; 42%                        | 45%  | n = 21; 47%                       |      | 0.815   | NS                    |
| Constipation                                            | Unknown  | n = 14; 45%                        |      | n = 9; 20%                        |      | 0.024   | NS                    |
| Attention deficit hyperactive disorder                  |          | n = 1; 3%                          | 15%  | n = 1; 2%                         |      | 1.000   | NS                    |
| <b>Mitochondrial complications, intermittent occur.</b> |          |                                    |      |                                   |      |         |                       |
| Anemia                                                  | Possibly | n = 21; 68%                        | 51%  | n = 28; 62%                       |      | 0.807   | NS                    |
| Leukopenia                                              | Possibly | n = 19; 61%                        | 31%  | n = 16; 36%                       |      | 0.036   | NS                    |
| Thrombocytopenia                                        | Possibly | n = 19; 61%                        | 28%  | n = 23; 51%                       |      | 0.483   | NS                    |
| Pancytopenia                                            | Possibly | n = 13; 42%                        | 19%  | n = 9; 20%                        | 0%   | 0.044   | NS                    |
| <b>Mitochondrial complications</b>                      |          |                                    |      |                                   |      |         |                       |
| None                                                    |          | n = 3; 10%                         |      | n = 3; 7%                         |      | 0.683   | NS                    |
| Mild                                                    |          | n = 8; 26%                         |      | n = 22; 49%                       |      | 0.057   | NS                    |
| Moderate                                                |          | n = 3; 9%                          |      | n = 10; 22%                       |      | 0.219   | NS                    |
| Severe                                                  |          | n = 5; 16%                         |      | n = 7; 16%                        |      | 1.000   | NS                    |
| Very severe                                             |          | n = 11; 35%                        |      | n = 3; 7%                         |      | 0.002   | <b>0.013</b>          |
| Death                                                   |          | n = 1; 3%                          |      | n = 0; 0%                         |      | 0.408   | NS                    |

Notes: a: Likelihood of mitochondrial pathophysiology [2]; Lit: percentage reported in literature [2]. Statistical significance was determined by performing Fisher's exact tests. All p-values were adjusted according to the Bonferroni method. Adjusted p-values < .05 were considered statistically significant and are depicted in bold. Abbreviations: NA: not assessed; NS: not significant.

**Table S8 – Prevalence of treatment-related and miscellaneous complications**

|                                        | <b>Propionic acidemia<br/>(n = 31)</b> | <b>Methylmalonic acidemia<br/>(n = 45)</b> | <b>P-value</b> | <b>Bonferroni<br/>correction</b> |
|----------------------------------------|----------------------------------------|--------------------------------------------|----------------|----------------------------------|
| <b>Treatment-related complications</b> |                                        |                                            |                |                                  |
| Reduced bone mineral density           | n = 9; 29%                             | n = 18; 40%                                | 0.465          | NS                               |
| Growth retardation/short stature       | n = 8; 26%                             | n = 13; 29%                                | 0.801          | NS                               |
| Obesity                                | n = 10; 32%                            | n = 6; 13%                                 | 0.084          | NS                               |
| Treatment-related complications        |                                        |                                            |                |                                  |
| None                                   | n = 12; 39%                            | n = 21; 47%                                | 0.638          | NS                               |
| Mild                                   | n = 13; 42%                            | n = 15; 33%                                | 0.477          | NS                               |
| Severe                                 | n = 4; 13%                             | n = 5; 11%                                 | 1.000          | NS                               |
| Very severe                            | n = 2; 6%                              | n = 4; 9%                                  | 1.000          | NS                               |
| <b>Miscellaneous complications</b>     |                                        |                                            |                |                                  |
| Pes planovalgus                        | n = 9; 29%                             | n = 13; 29%                                | 1.000          | NS                               |
| Port-a-cath infections                 | n = 3; 10%                             | n = 2; 4%                                  | 0.393          | NS                               |
| Enamel defects                         | n = 1; 3%                              | n = 3; 7%                                  | 0.641          | NS                               |
| Urolithiasis                           | n = 1; 3%                              | n = 1; 2%                                  | 1.000          | NS                               |
| Gout                                   | n = 0; 0%                              | n = 2; 4%                                  | 0.511          | NS                               |

Notes: Statistical significance was determined by performing Fisher's exact tests. All p-values were adjusted according to the Bonferroni method. Adjusted p-values < .05 were considered statistically significant and are depicted in bold. Abbreviations: NS: not significant.

**Supplementary Table 9 – Minimum requirements for follow-up of the post-NBS cohort**

|                                                                                                                                                                                                                                                                                                                                                                                                                                          | <b>Items to record</b>                                                                                                                          | <b>Diagnostics to perform</b>                                                                                                                                                                                                                                                                                                                                              |
|------------------------------------------------------------------------------------------------------------------------------------------------------------------------------------------------------------------------------------------------------------------------------------------------------------------------------------------------------------------------------------------------------------------------------------------|-------------------------------------------------------------------------------------------------------------------------------------------------|----------------------------------------------------------------------------------------------------------------------------------------------------------------------------------------------------------------------------------------------------------------------------------------------------------------------------------------------------------------------------|
| <b><i>Patient characteristics</i></b>                                                                                                                                                                                                                                                                                                                                                                                                    |                                                                                                                                                 |                                                                                                                                                                                                                                                                                                                                                                            |
| Patient                                                                                                                                                                                                                                                                                                                                                                                                                                  | Day of birth<br>Sex                                                                                                                             |                                                                                                                                                                                                                                                                                                                                                                            |
| Family                                                                                                                                                                                                                                                                                                                                                                                                                                   | Ancestry<br>Consanguinity                                                                                                                       |                                                                                                                                                                                                                                                                                                                                                                            |
| Mutation                                                                                                                                                                                                                                                                                                                                                                                                                                 | g. / c. / p. coding sequence                                                                                                                    | Genetic testing                                                                                                                                                                                                                                                                                                                                                            |
| Vitamin B12 responsiveness                                                                                                                                                                                                                                                                                                                                                                                                               | Type enzymatic assay<br>Results enzymatic assay                                                                                                 | Enzymatic assay B12 responsiveness                                                                                                                                                                                                                                                                                                                                         |
| PCC activity                                                                                                                                                                                                                                                                                                                                                                                                                             | Type enzymatic assay<br>Results enzymatic assay                                                                                                 | Enzymatic assay PCC activity                                                                                                                                                                                                                                                                                                                                               |
| Death                                                                                                                                                                                                                                                                                                                                                                                                                                    | Day of death<br>Cause of death                                                                                                                  |                                                                                                                                                                                                                                                                                                                                                                            |
| Follow-up                                                                                                                                                                                                                                                                                                                                                                                                                                | Age at last follow-up                                                                                                                           |                                                                                                                                                                                                                                                                                                                                                                            |
| <b><i>Adverse outcome of first sympt. phase</i></b>                                                                                                                                                                                                                                                                                                                                                                                      |                                                                                                                                                 |                                                                                                                                                                                                                                                                                                                                                                            |
| First presentation                                                                                                                                                                                                                                                                                                                                                                                                                       | Symptomatic/asymptomatic<br>Day of first symptoms<br>Day of diagnosis                                                                           |                                                                                                                                                                                                                                                                                                                                                                            |
| Adverse outcome first presentation                                                                                                                                                                                                                                                                                                                                                                                                       | Day of brain MRI<br>Brain MRI results<br>Movement disorder                                                                                      | Brain MRI at set times<br><br>Consult neurologist                                                                                                                                                                                                                                                                                                                          |
| <b><i>AMD frequency</i></b>                                                                                                                                                                                                                                                                                                                                                                                                              |                                                                                                                                                 |                                                                                                                                                                                                                                                                                                                                                                            |
| Number of AMD                                                                                                                                                                                                                                                                                                                                                                                                                            | Day of admission<br>Day of release<br>Reason of admission                                                                                       |                                                                                                                                                                                                                                                                                                                                                                            |
| <b><i>Cognitive function</i></b>                                                                                                                                                                                                                                                                                                                                                                                                         |                                                                                                                                                 |                                                                                                                                                                                                                                                                                                                                                                            |
| Cognition                                                                                                                                                                                                                                                                                                                                                                                                                                | Day of neuropsychological tests<br>Neuropsychological test type<br>Neuropsychological test results; IQ                                          | Neuropsychological tests at set times                                                                                                                                                                                                                                                                                                                                      |
| Education                                                                                                                                                                                                                                                                                                                                                                                                                                | School career<br>Type of employment                                                                                                             |                                                                                                                                                                                                                                                                                                                                                                            |
| <b><i>Mitochondrial complications</i></b>                                                                                                                                                                                                                                                                                                                                                                                                |                                                                                                                                                 |                                                                                                                                                                                                                                                                                                                                                                            |
| Hepatomegaly<br>Epilepsy<br>Cardiomyopathy<br>Prolonged QTc interval<br>Optic atrophy<br>Renal failure<br><br>Pancreatitis<br>Sensorineural hearing loss<br>Acute psychosis<br>Stroke-like episodes<br>Premature ovarian insufficiency<br>Exercise intolerance<br>Muscular hypotonia<br>Feeding problems<br>Constipation<br>Autism<br>Attention deficit hyperactive disorder<br>Anemia<br>Leukopenia<br>Thrombocytopenia<br>Pancytopenia | Day of diagnostic study<br>Results of diagnostic study<br>Presence complication yes/no                                                          | Liver ultrasound at set times<br>EEG at set times<br>Cardiac ultrasound at set times<br>ECG at set times<br>Consult ophthalmologist at set times<br>Urine kidney function biochemistry at set times<br>Complete blood count at set times<br><br>On indication: consult ENT doctor, gastro-<br>enterologist, neurologist, gynecologist,<br>psychiatrist, physical therapist |
| <b><i>Treatment-related complications</i></b>                                                                                                                                                                                                                                                                                                                                                                                            |                                                                                                                                                 |                                                                                                                                                                                                                                                                                                                                                                            |
| Bone mineral density<br>Growth retardation<br>Obesity                                                                                                                                                                                                                                                                                                                                                                                    | Day of diagnostic study<br>Results of diagnostic study<br>Presence complication yes/no<br>Visit date each visit<br>Weight and length each visit | DEXA-scan at set times                                                                                                                                                                                                                                                                                                                                                     |

Abbreviations: Adverse outcome of first sympt. phase: Adverse outcome of the first symptomatic phase. DEXA: dual-energy X-ray absorptiometry; ECG: electrocardiogram; EEG: electroencephalogram; ENT: ear-nose-throat; MRI: magnetic resonance imaging; PCC: propionyl-CoA carboxylase; IQ: intelligence quotient. g./c./p. coding sequence: genetic change in the DNA coding sequence and resulting change in the protein coding sequence.

**Figure S1 – Grouped outcome parameters according to presentation type**

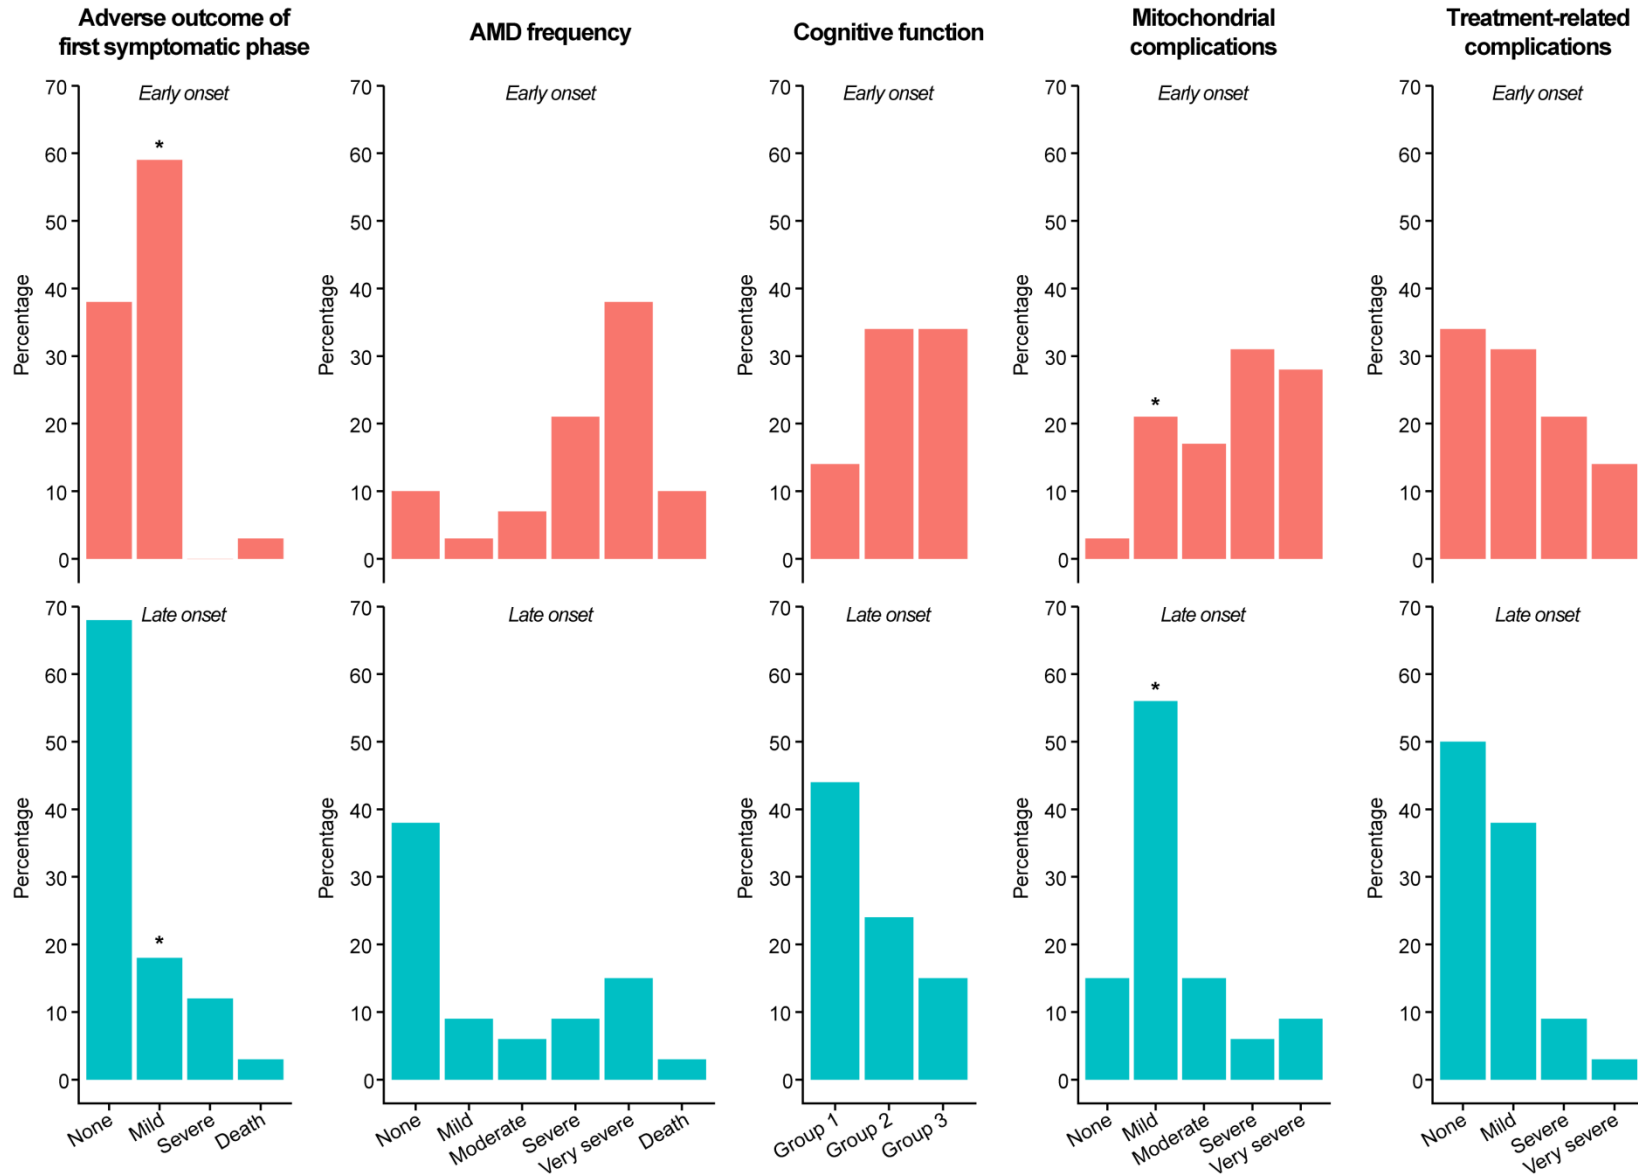

Visual representation of Table 2. Categories of the outcome parameters are depicted on the x-axis, percentages are depicted on the y-axis. Early onset (presentation  $\leq 28$  days of life) is depicted in orange, late onset (presentation  $> 28$  days of life) is depicted in blue. Statistical significance was determined by Fisher's exact tests. All p-values were adjusted according to the Bonferroni method. Adjusted p-values  $< .05$  were considered statistically significant and are depicted with bold asterisks, as in Table 2.

**Supplementary Figure 2 – Early onset presentation in PA tends to be an independent predictor for four mitochondrial complications with acute onset**

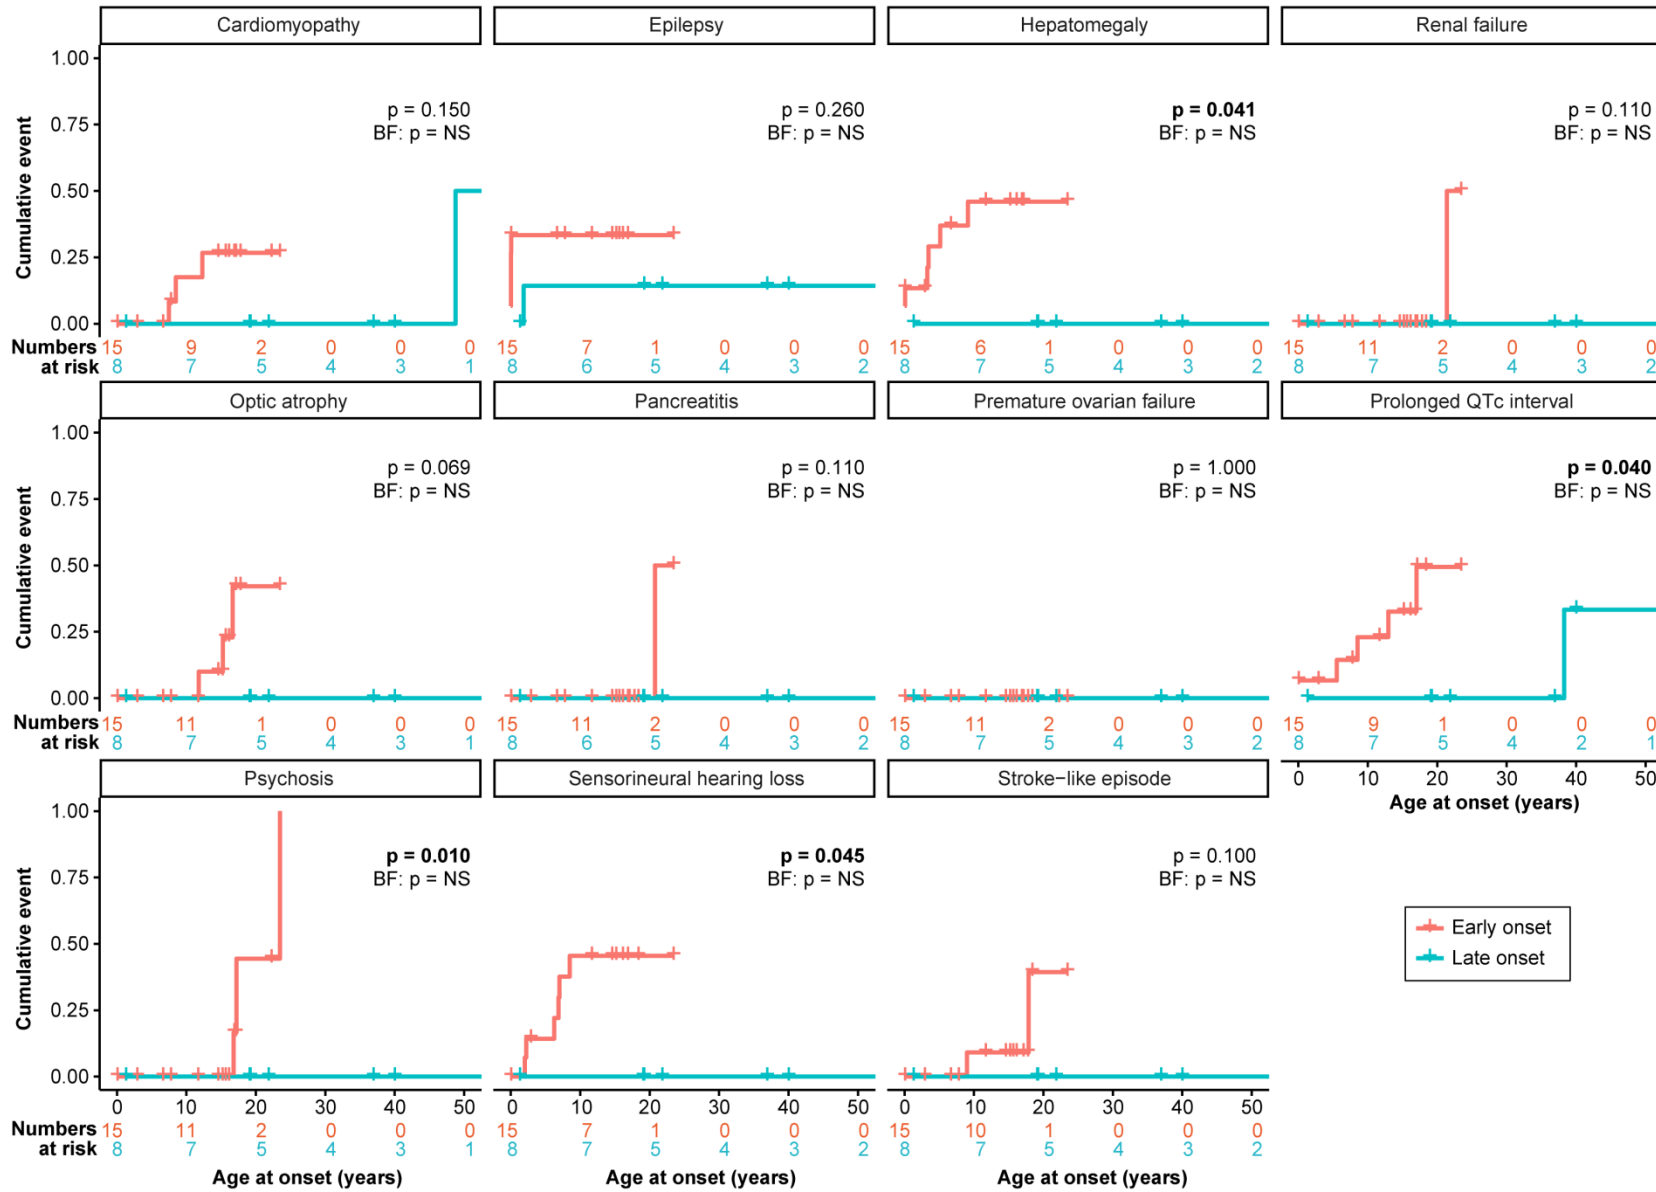

Kaplan-Meier plots wherein the y-axis depicts the cumulative percentage and the x-axis depicts patient age in years. The panels demonstrate the different mitochondrial complications with acute onset, for patients with late onset presentation in blue versus patients with early onset presentation in orange. Numbers at risk, indicating the number of patients at risk for a certain complication are depicted below the panels, in corresponding colors. Early onset: presentation  $\leq 28$  days of life; Late onset: presentation  $> 28$  days of life. All p-values were adjusted according to the Bonferroni method. Adjusted p-values  $< 0.05$  were considered statistically significant and are depicted in bold. Abbreviations: BF: Bonferroni; NS: not significant.

**Supplementary Figure 3 – Vitamin B12 unresponsiveness in MMA tends to be an independent predictor for three mitochondrial complications with acute onset and is a significant predictor for the occurrence of renal failure**

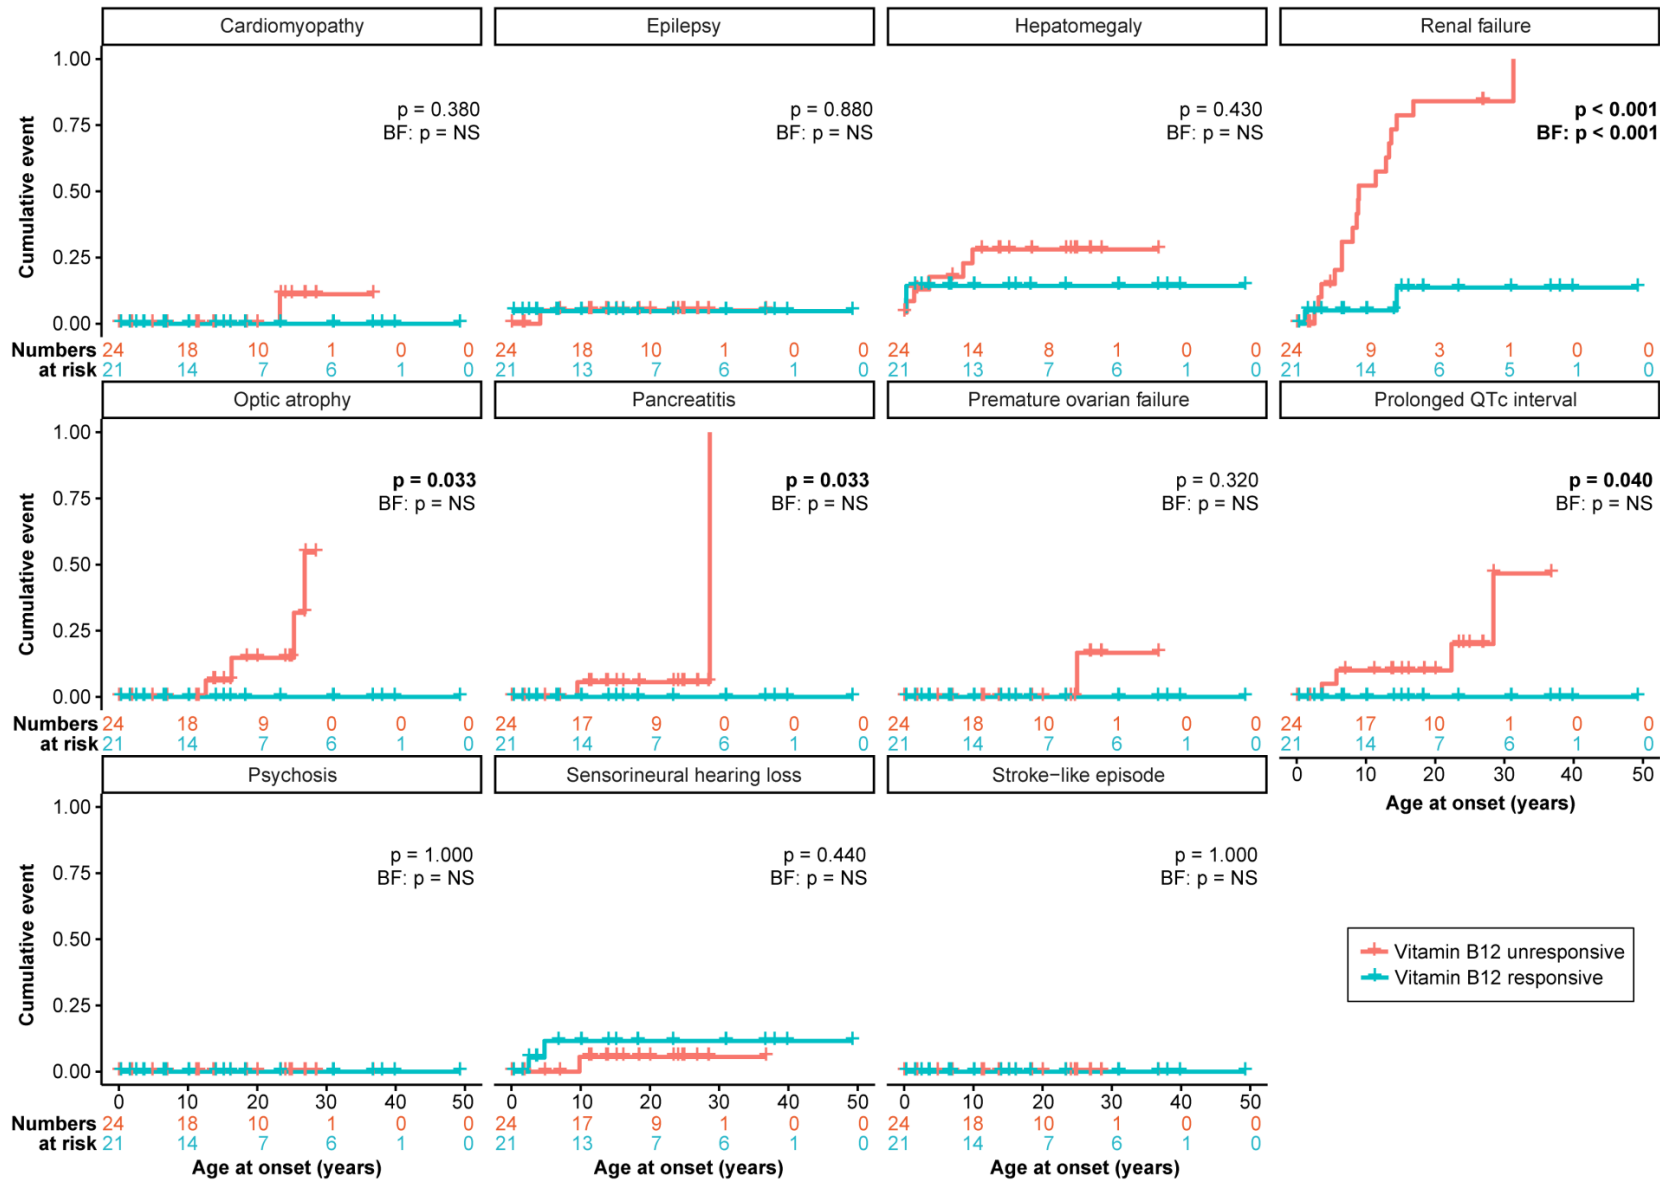

Kaplan-Meier plots wherein the y-axis depicts the cumulative percentage and the x-axis depicts patient age in years. The panels demonstrate the different mitochondrial complications with acute onset, for vitamin B12 responsive patients in blue versus vitamin B12 unresponsive patients in orange. Numbers at risk, indicating the number of patients at risk for a certain complication are depicted below the panels, in corresponding colors. All p-values were adjusted according to the Bonferroni method. Adjusted p-values < 0.05 were considered statistically significant and are depicted in bold. Abbreviations: BF: Bonferroni; NS: not significant.
